# Supplementary material for: Vitamin D Is Necessary for Murine Gastric Epithelial Homeostasis
Source: MDPI journal article supplement (doi:10.3390/biology10080705), 2021-07-23

**Figure 1-e:**

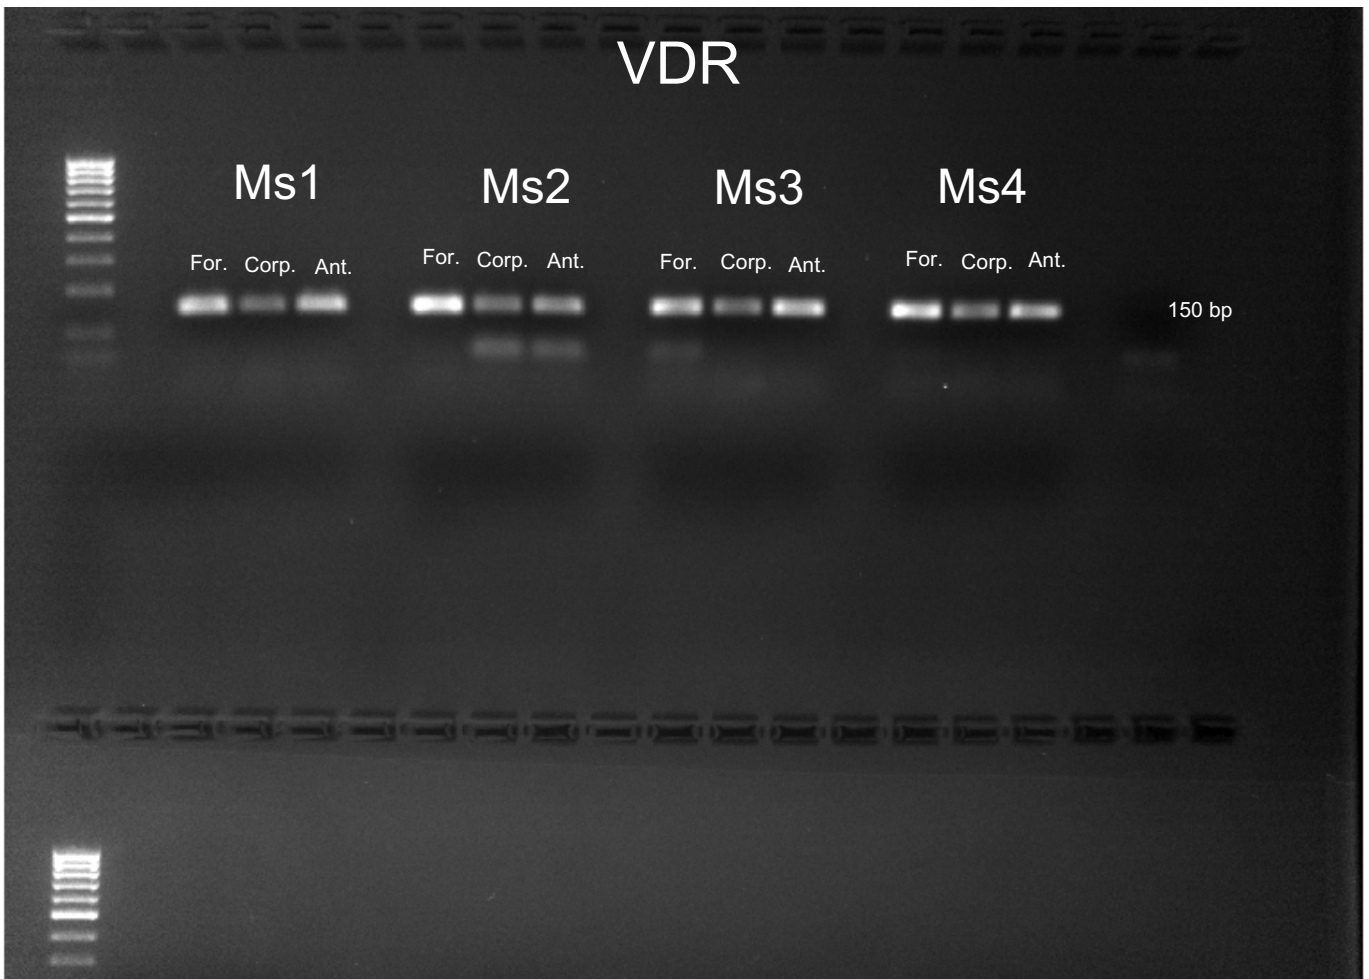

- Ladder used: 1000 , min is 50 bp

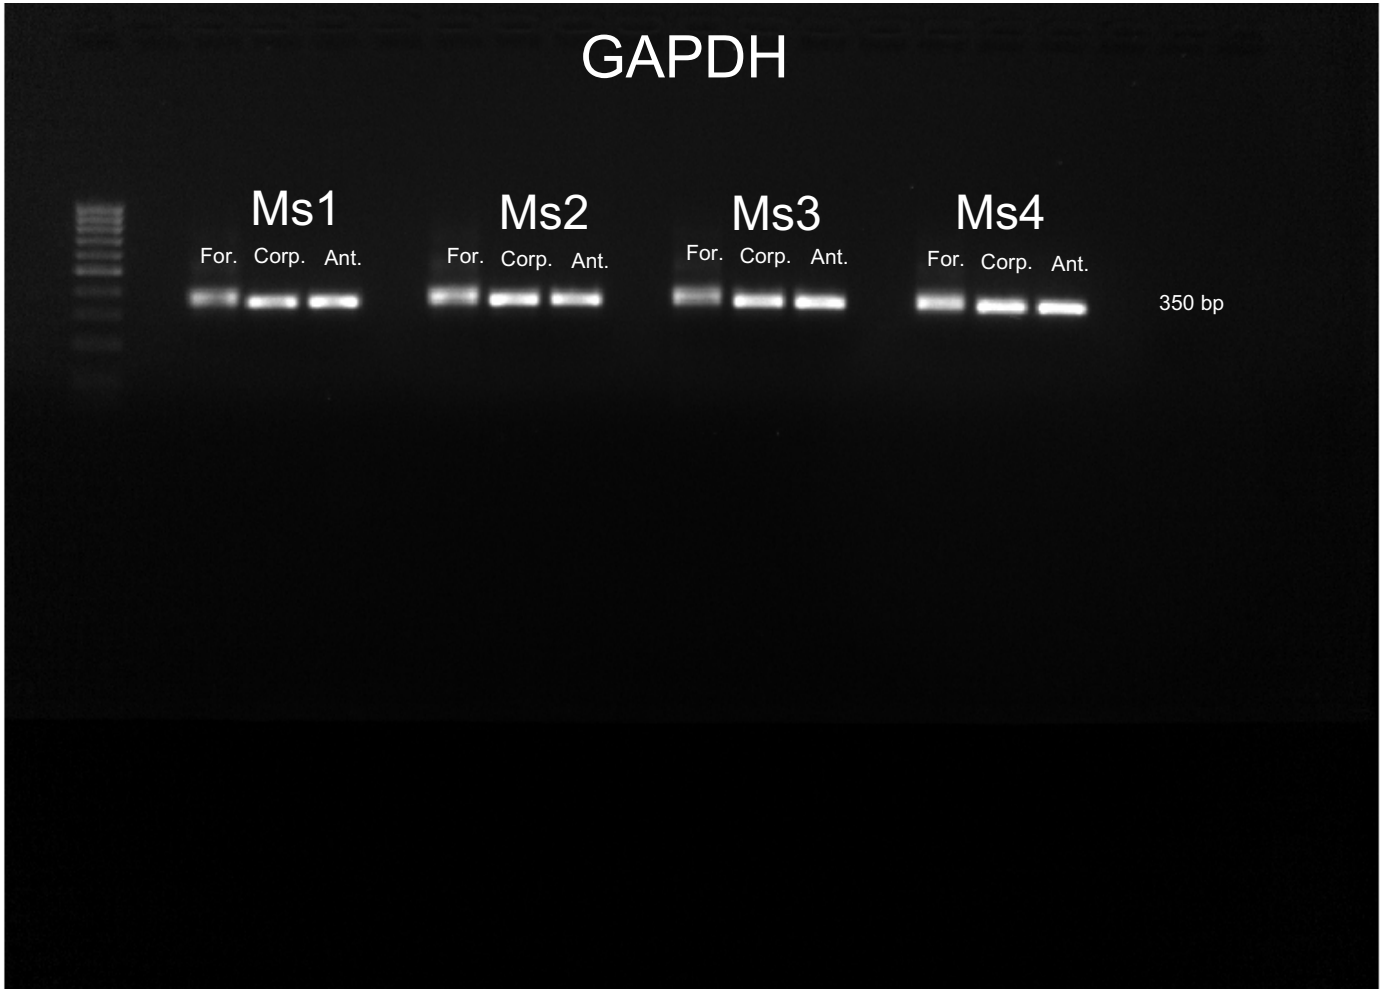

- Ladder used: 1000 , min is 50 bp

Figure 3:

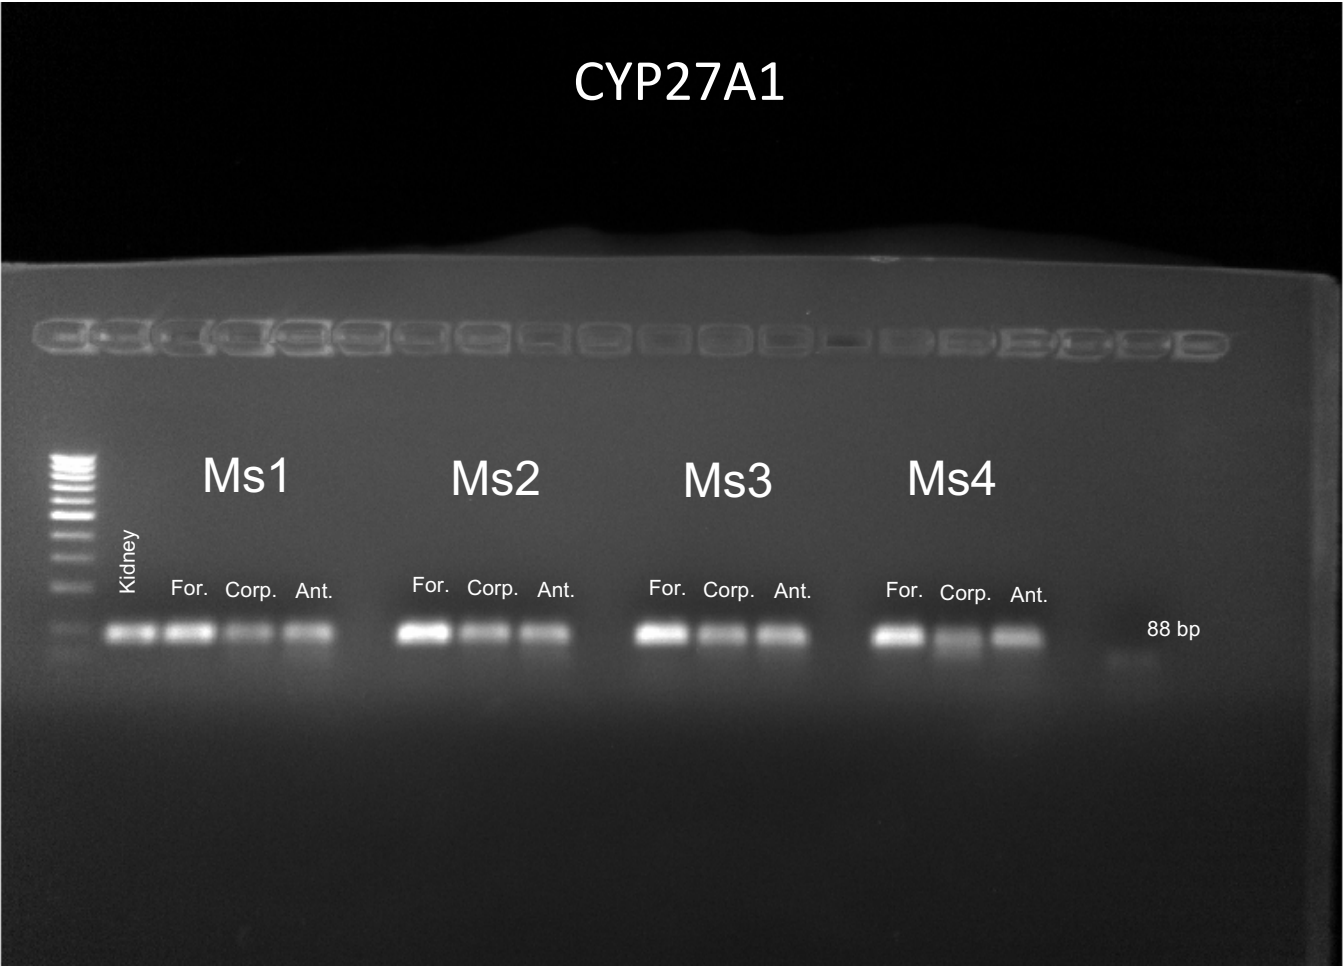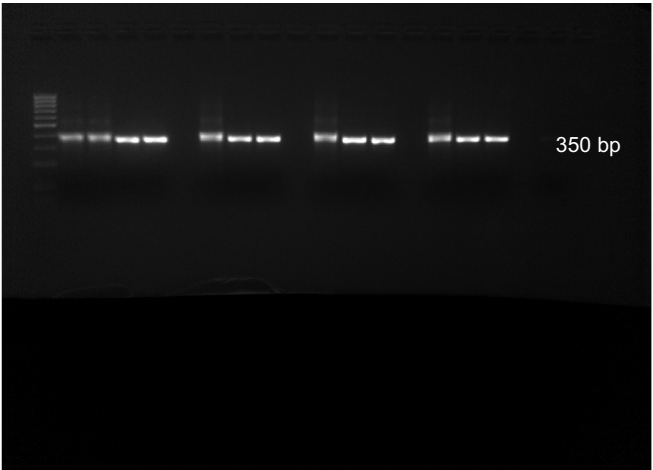

- Ladder used: 1000 , min is 50 bp

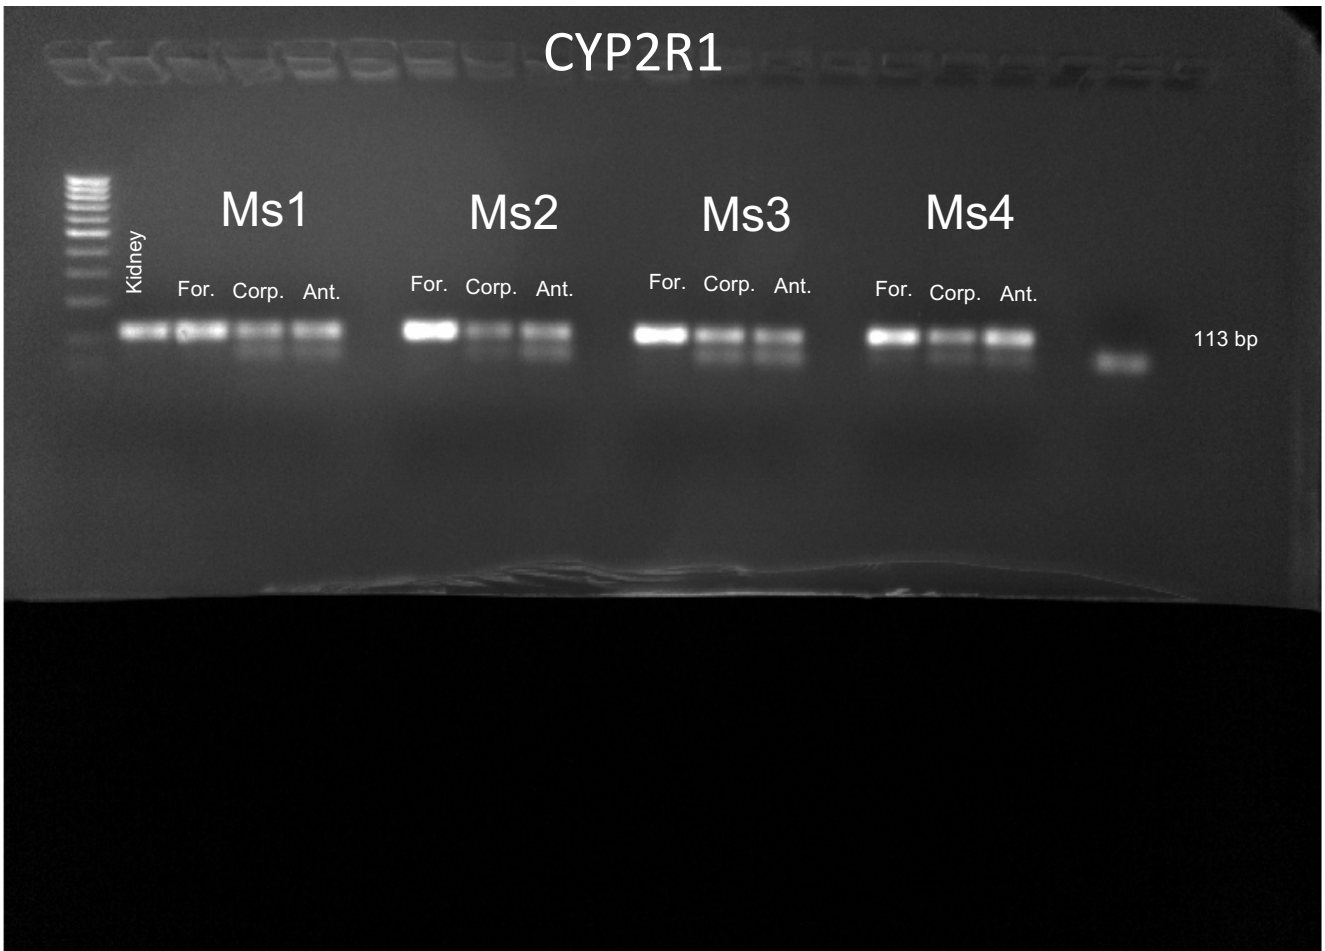

- Ladder used: 1000 , min is 50 bp

CYP27B1

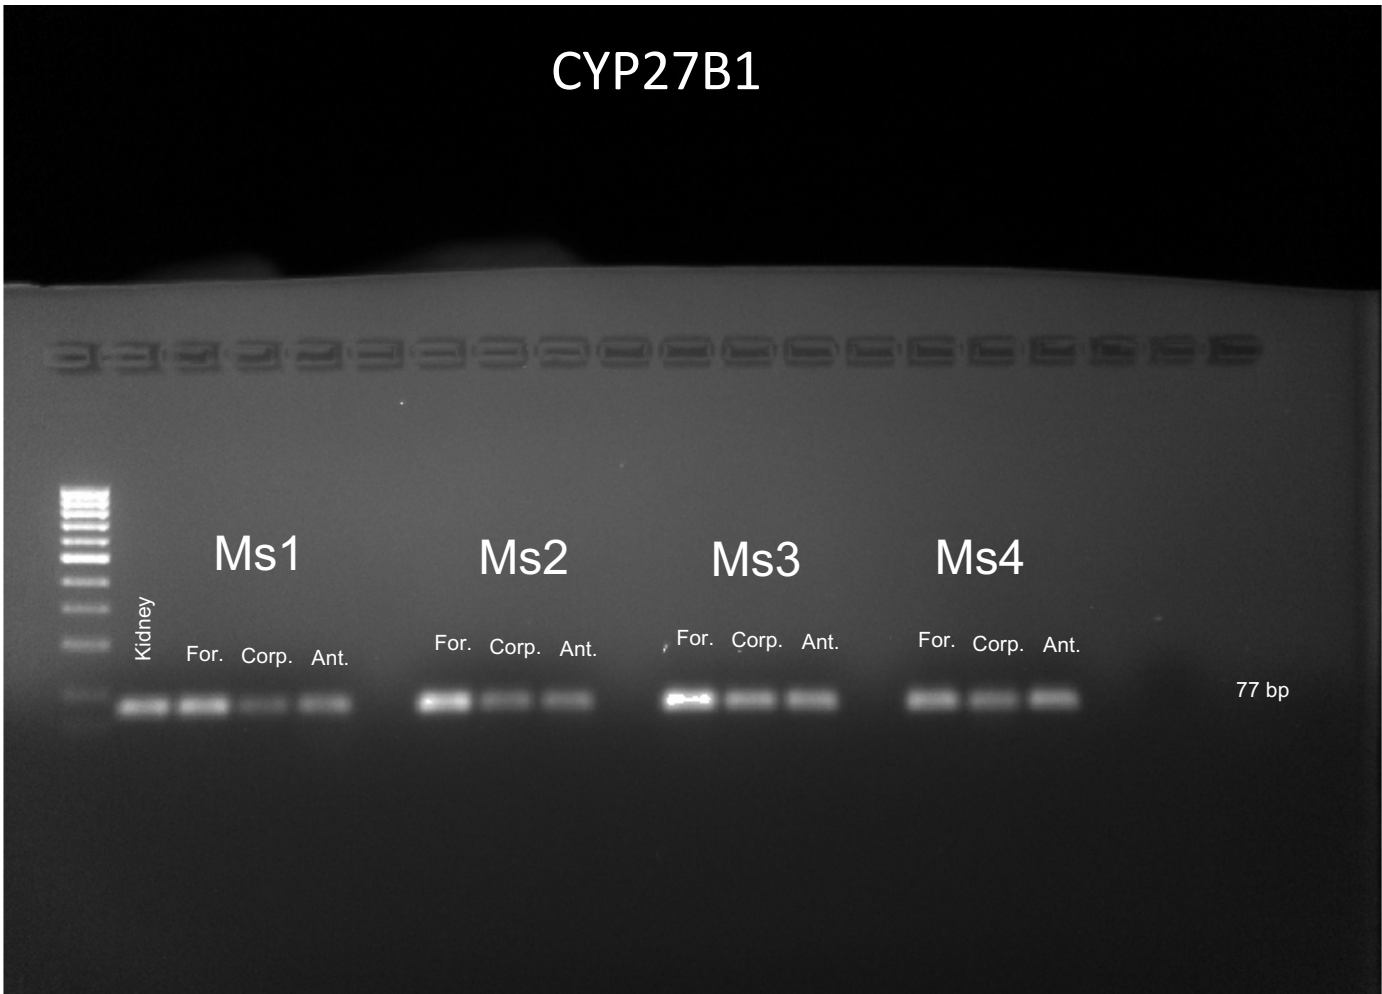

GAPDH

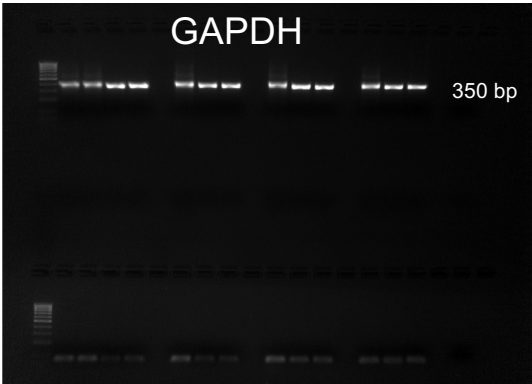

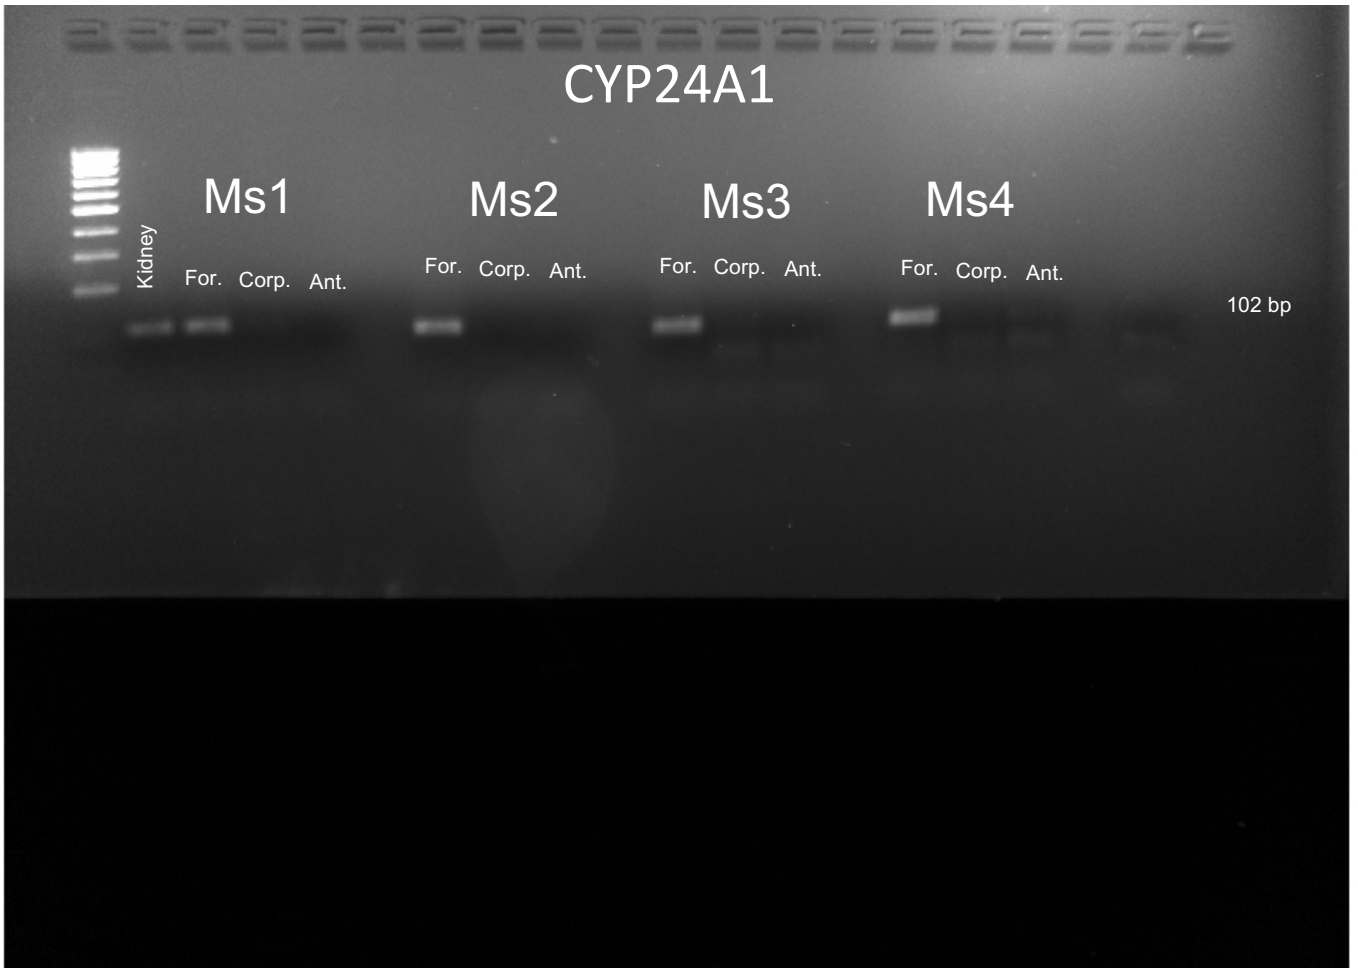

- Ladder used: 1000 , min is 50 bp

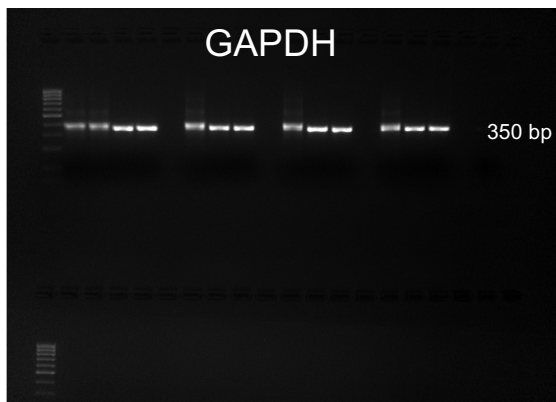

Supplement: s1 [file s1]
