# Supplementary material for: Vitamin D Is Necessary for Murine Gastric Epithelial Homeostasis
Source: MDPI journal article supplement (doi:10.3390/biology10080705), 2021-07-23
Supplement: s1 [file s1]

**Table S1: Oligonucleotide primers for the amplification of *Vdr* and *Cyp***

|                                                         | Gene           | Forward                            | Reverse                               | Product size (bp) |
|---------------------------------------------------------|----------------|------------------------------------|---------------------------------------|-------------------|
| <b>Receptor</b>                                         |                |                                    |                                       |                   |
| 1                                                       | <i>Vdr</i>     | 5'- GAATGTGCCTCGGATCTGTGG-3'       | 5'- ATGCGGCAATCTCCATTGAAG-3'          | 150               |
| <b>Vitamin D metabolites enzymes (<i>CYP</i> genes)</b> |                |                                    |                                       |                   |
| 2                                                       | <i>Cyp27b1</i> | 5'- TCAGCAGGCATCGCAGAAC-3'         | 5' GCATTGGATCCTGAGGAATGA-3'           | 77                |
| 3                                                       | <i>Cyp24a1</i> | 5'- CTCCCTATGGATGCAGTATGTATAGTG-3' | 5'- TTAAAAACGTTGTCAGTAGGTCATAACT-3'   | 102               |
| 4                                                       | <i>Cyp2r1</i>  | 5'- CAGAAAGACGCTGAAAGTGCAA -3'     | 5'- CAGTGTATTTGTGTTTACTTGGCTTTATAA-3' | 113               |
| 5                                                       | <i>Cyp27a1</i> | 5'- GGAGGGCAAGTACCCAATAAGA -3'     | 5'- TGCGATGAAGATCCCATAGGT-3'          | 88                |
| <b>Differentiation markers</b>                          |                |                                    |                                       |                   |
| 6                                                       | <i>Atp4a</i>   | 5'-TGTACACATGAGAGTCCCCTT G-3'      | 5'-GAGTCTTCTCGTTTTCCACACC-3'          | 157               |
| 7                                                       | <i>Atp4b</i>   | 5'-AAC AGA ATT GTC AAG TTC CTC-3'  | 5'-AGA CTG AAG GTG CCA TTG-3'         | 140               |
| 8                                                       | <i>Gast</i>    | 5'-GGACCAGGGACCAATGAGG-3'          | 5'-CCAAAGTCCATCCATCCGTAGG-3'          | 173               |
| 9                                                       | <i>If</i>      | 5'-CTT GGC CCT GAC CTG TAT GT-3'   | 5'-TAG GTT GCT CAG GTG TCA CG-3'      | 191               |
| 10                                                      | <i>Muc5ac</i>  | 5'-GTGGTTTGACACTGACTTCCC-3'        | 5'-CTCCTCTCGGTGACAGAGTCT-3'           | 103               |
| 11                                                      | <i>Muc6</i>    | 5'-AGCCACATTCCCTATCAGC-3'          | 5'-CACAGTGGAAGATTGCGAGAG-3'           | 192               |
| <b>VDR target genes</b>                                 |                |                                    |                                       |                   |
| 12                                                      | <i>Pthlh</i>   | 5- GACGTACAAAGAACAGCCACTCA-3       | 5'- TTTTCTCCTGTTCTCTGCGTTT-3'         | 81                |
| 13                                                      | <i>Trpv6</i>   | 5-TGACCCCTAAGGATGACCTCC-3          | 5'-CTGTCCAAAGAATCGAGTGACC-3'          | 122               |
| 14                                                      | <i>p21</i>     | 5-CGCTGTCTTGCACTCTGGT-3            | 5'-CGTTTTTCGGCCCTGAGATGTT-3'          | 76                |
| <b>Housekeeping gene</b>                                |                |                                    |                                       |                   |
| 15                                                      | <i>Gapdh</i>   | 5'-TCAAGAAGGTGGTGAAGCAGG-3'        | 5'-TATTATGGGGTCTGGGATGG-3'            | 350               |
